# Supplementary material for: Rosmarinic Acid Methyl Ester Regulates Ovarian Cancer Cell Migration and Reverses Cisplatin Resistance by Inhibiting the Expression of Forkhead Box M1
Source: PubMed Central journal article supplement (PMC7601071; doi:10.3390/ph13100302), 2020-10-12
Supplement: pharmaceuticals-13-00302-s001.pdf [file pharmaceuticals-13-00302-s001.pdf]

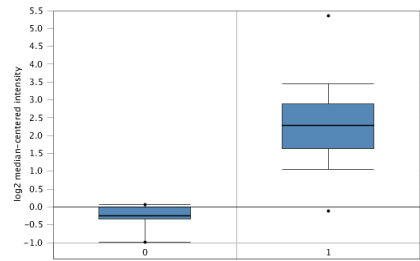

**TCGA Ovarian**

(p-value: 8.64E-9)

0. No value (8)

1. Ovarian Serous Cystadenocarcinoma (586)

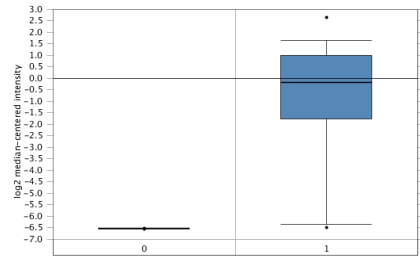

**Welsh Ovarian**

(p-value: 1.13E-11)

0. No value (4)

1. Ovarian Serous Surface Papillary Carcinoma (28)

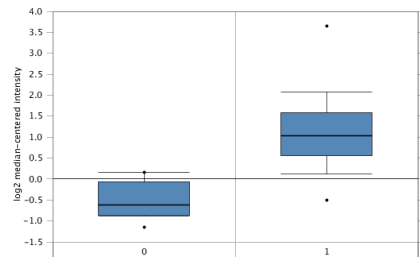

**Benome Ovarian**

(p-value: 2.45E-8)

0. No value (10)

1. Ovarian Carcinoma (185)

**Figure 1. FOXM1 expression level in ovarian cancer patients.** The relative mRNA expression of FOXM1 in TCGA cohort (Normal : 8, Cancer: 586) and two Oncomine dataset: Welsh Ovarian (Normal : 4, Cancer: 28) and Benome Ovarian (Normal : 10, Cancer: 185).

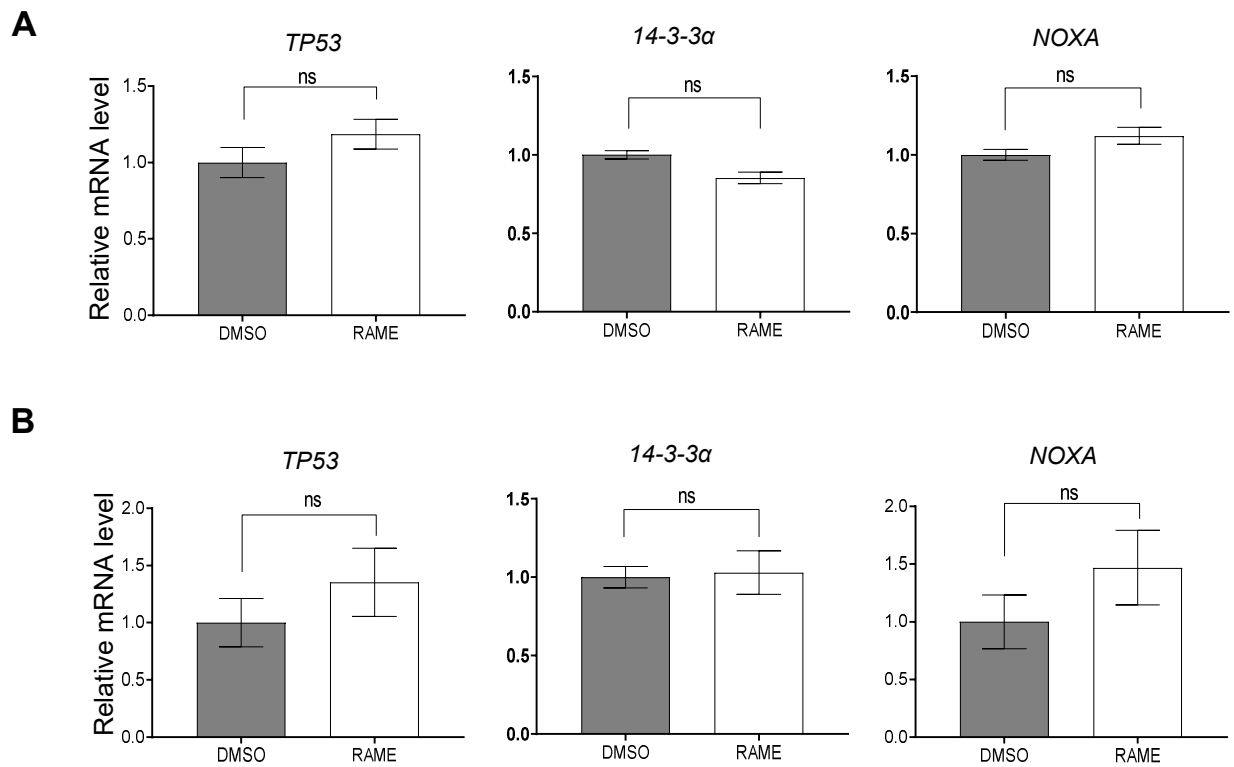

**Figure 2. Apoptosis marker gene expression by RAME treatment in ovarian cancer cell.** (A) The relative mRNA expression of apoptosis marker genes in SKOV-3 cells by RAME treatment (40 $\mu$ M). (B) The relative mRNA expression of apoptosis marker genes in TOV-21G cells by RAME treatment (40 $\mu$ M). Error bars represent the mean  $\pm$  SEM ( $n = 3$ ). *ns* : not significant.

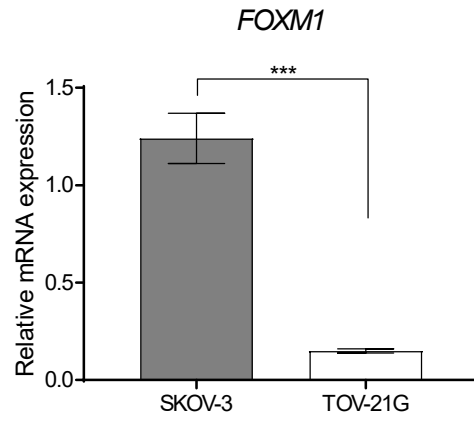

**Figure 3. The mRNA level of FOXM1 in SKOV-3 and TOV-21G cells.** The relative mRNA expression of FOXM1 in SKOV-3 and TOV-21G ovarian cancer cell lines. Error bars represent the mean  $\pm$  SEM ( $n = 3$ ). \* $p < 0.05$ , \*\* $p < 0.01$ , \*\*\* $p < 0.001$ ; unpaired t test.

**Table 1.** The list of 242 down-regulated genes in RAME treated SKOV-3 ovarian cancer cells ( $|\log_2$  (Fold change)|  $> 1$ ,  $p$ -value  $< 0.05$ ).

| Gene symbol | RAME / Con  |         |
|-------------|-------------|---------|
|             | Fold change | p-value |
| AMOTL2      | 0.063       | 0.000   |
| CRTC2       | 0.086       | 0.027   |
| TOP2A       | 0.098       | 0.033   |
| SMARCAD1    | 0.107       | 0.021   |
| PIF1        | 0.110       | 0.003   |
| FOXO6       | 0.118       | 0.017   |
| PPM1H       | 0.133       | 0.001   |
| CCDC178     | 0.136       | 0.014   |
| ELMSAN1     | 0.149       | 0.034   |
| RUNX2       | 0.157       | 0.020   |
| ZNF704      | 0.163       | 0.015   |
| RBM12B      | 0.163       | 0.015   |
| ATP5C1      | 0.185       | 0.013   |
| LATS2       | 0.187       | 0.011   |
| ADAM9       | 0.193       | 0.046   |
| APITD1-CORT | 0.196       | 0.016   |
| POU3F1      | 0.196       | 0.016   |
| ARMT1       | 0.197       | 0.005   |
| POLR1A      | 0.198       | 0.039   |
| CCNB1       | 0.203       | 0.020   |
| ESR1        | 0.206       | 0.038   |
| PLS1        | 0.207       | 0.002   |
| KAT8        | 0.210       | 0.021   |
| SPTBN4      | 0.210       | 0.018   |
| SWT1        | 0.211       | 0.001   |
| PRC1-AS1    | 0.212       | 0.033   |
| TMEM168     | 0.221       | 0.005   |
| NDUFA4P1    | 0.229       | 0.008   |
| TMEM203     | 0.229       | 0.008   |
| FILIP1L     | 0.230       | 0.016   |
| TMPO        | 0.232       | 0.013   |
| NSMAF       | 0.244       | 0.007   |
| NDST3       | 0.248       | 0.047   |
| DHDDS       | 0.249       | 0.001   |
| MAML2       | 0.256       | 0.009   |
| GJA9-MYCBP  | 0.256       | 0.044   |
| SFI1        | 0.257       | 0.010   |
| PISD        | 0.257       | 0.010   |
| ACVR2A      | 0.258       | 0.011   |
| LARP1       | 0.261       | 0.021   |
| ARID1A      | 0.264       | 0.004   |
| ZNF518A     | 0.265       | 0.033   |
| ZNRF3       | 0.265       | 0.012   |
| GADD45GIP1  | 0.269       | 0.030   |
| SORBS2      | 0.270       | 0.026   |
| NAB1        | 0.270       | 0.008   |
| ETS1        | 0.270       | 0.030   |
| SKA3        | 0.271       | 0.041   |
| FADS3       | 0.273       | 0.032   |
| RGCC        | 0.273       | 0.032   |
| UBE2C       | 0.273       | 0.032   |
| HERC3       | 0.273       | 0.032   |
| CENPH       | 0.273       | 0.032   |
| WDR55       | 0.273       | 0.032   |
| TTPAL       | 0.275       | 0.034   |
| C11orf63    | 0.275       | 0.015   |
| TMEM163     | 0.275       | 0.015   |
| TTC17       | 0.277       | 0.002   |
| CENPF       | 0.277       | 0.021   |
| AKIRIN1     | 0.281       | 0.038   |
| ZNF746      | 0.282       | 0.045   |
| NAP1L3      | 0.282       | 0.040   |
| STARD13     | 0.283       | 0.024   |
| HOXA-AS3    | 0.285       | 0.003   |

|          |       |       |
|----------|-------|-------|
| EXTL3    | 0.289 | 0.032 |
| H1FX     | 0.289 | 0.048 |
| MARCKS   | 0.292 | 0.008 |
| MKRN2    | 0.293 | 0.028 |
| TWSG1    | 0.293 | 0.015 |
| MYCBP    | 0.295 | 0.011 |
| C16orf52 | 0.295 | 0.031 |
| RAB10    | 0.295 | 0.002 |
| NDUFAF5  | 0.295 | 0.035 |
| CALML4   | 0.299 | 0.003 |
| CDH7     | 0.300 | 0.027 |
| CCDC112  | 0.301 | 0.037 |
| GUCD1    | 0.304 | 0.003 |
| HOXA5    | 0.304 | 0.001 |
| TGFB3    | 0.305 | 0.001 |
| SRBD1    | 0.305 | 0.001 |
| WRN      | 0.305 | 0.001 |
| CAV1     | 0.305 | 0.013 |
| SIX4     | 0.309 | 0.040 |
| BCL2     | 0.310 | 0.026 |
| USP54    | 0.311 | 0.044 |
| CTGF     | 0.312 | 0.041 |
| CHIC2    | 0.315 | 0.010 |
| MECOM    | 0.315 | 0.037 |
| EXT1     | 0.315 | 0.025 |
| RFX3     | 0.319 | 0.014 |
| PDLIM5   | 0.320 | 0.017 |
| ACSL1    | 0.321 | 0.039 |
| VAPA     | 0.322 | 0.027 |
| MPLKIP   | 0.322 | 0.010 |
| WDR20    | 0.324 | 0.028 |
| FAM129A  | 0.324 | 0.023 |
| PPTC7    | 0.326 | 0.033 |
| RAB28    | 0.331 | 0.005 |
| ZZEF1    | 0.333 | 0.004 |
| CDC73    | 0.335 | 0.010 |
| TENM3    | 0.336 | 0.050 |
| ACAT1    | 0.339 | 0.023 |
| UBQLN2   | 0.340 | 0.014 |
| KCTD20   | 0.341 | 0.037 |
| RPRD2    | 0.341 | 0.049 |
| SPRED1   | 0.343 | 0.017 |
| KCTD1    | 0.344 | 0.022 |
| MASP2    | 0.344 | 0.034 |
| S1PR1    | 0.344 | 0.034 |
| FAM72B   | 0.344 | 0.034 |
| FHOD1    | 0.344 | 0.034 |
| TSSK2    | 0.344 | 0.034 |
| SENP7    | 0.344 | 0.034 |
| MRS2     | 0.344 | 0.034 |
| RAPGEF5  | 0.344 | 0.034 |
| PTAR1    | 0.344 | 0.034 |
| PAK1     | 0.348 | 0.046 |
| FAM131A  | 0.352 | 0.038 |
| ZNF319   | 0.354 | 0.010 |
| IQGAP2   | 0.354 | 0.048 |
| PKNOX1   | 0.355 | 0.007 |
| CHTOP    | 0.355 | 0.034 |
| SYNE1    | 0.356 | 0.037 |
| RALGAPB  | 0.358 | 0.049 |
| PNRC2    | 0.358 | 0.038 |
| RDH10    | 0.362 | 0.039 |
| RAF1     | 0.363 | 0.032 |
| SP1      | 0.366 | 0.008 |
| STK24    | 0.367 | 0.025 |
| WDR5B    | 0.367 | 0.011 |
| RFK      | 0.369 | 0.009 |
| CCBE1    | 0.371 | 0.029 |
| MECP2    | 0.373 | 0.038 |

|           |       |       |
|-----------|-------|-------|
| RYR3      | 0.373 | 0.046 |
| RP9P      | 0.375 | 0.039 |
| ELK1      | 0.377 | 0.010 |
| UBE2W     | 0.377 | 0.045 |
| ZNF593    | 0.384 | 0.039 |
| HTT       | 0.385 | 0.030 |
| PIAS4     | 0.388 | 0.004 |
| FGF13     | 0.389 | 0.028 |
| NCKIPSD   | 0.391 | 0.014 |
| LZIC      | 0.394 | 0.001 |
| SLC25A24  | 0.394 | 0.001 |
| MYRF      | 0.394 | 0.001 |
| FOXM1     | 0.394 | 0.001 |
| MRPS35    | 0.394 | 0.001 |
| ZNF891    | 0.394 | 0.001 |
| C14orf2   | 0.394 | 0.001 |
| CRISPLD2  | 0.394 | 0.001 |
| IRF3      | 0.394 | 0.001 |
| ZNF444    | 0.394 | 0.001 |
| CKAP2L    | 0.394 | 0.001 |
| TMEM177   | 0.394 | 0.001 |
| SLC35E4   | 0.394 | 0.001 |
| LYRM7     | 0.394 | 0.001 |
| PAK1IP1   | 0.394 | 0.001 |
| AKAP7     | 0.394 | 0.001 |
| TTC39B    | 0.394 | 0.001 |
| FBXW5     | 0.394 | 0.001 |
| ERCC6L    | 0.394 | 0.001 |
| TCEAL4    | 0.394 | 0.001 |
| RHOBTB3   | 0.394 | 0.034 |
| MEX3A     | 0.396 | 0.008 |
| AP3D1     | 0.398 | 0.018 |
| ANKRD1    | 0.398 | 0.004 |
| ZNF207    | 0.399 | 0.007 |
| GNPDA1    | 0.399 | 0.043 |
| NRIP1     | 0.406 | 0.010 |
| ZNRF1     | 0.407 | 0.010 |
| TCF20     | 0.407 | 0.015 |
| KLF3      | 0.407 | 0.038 |
| SNRNP70   | 0.408 | 0.045 |
| LUC7L3    | 0.411 | 0.027 |
| ARIH1     | 0.413 | 0.006 |
| E2F5      | 0.413 | 0.007 |
| C8orf59   | 0.417 | 0.009 |
| TMEM87A   | 0.417 | 0.012 |
| CDC27     | 0.418 | 0.014 |
| OCRL      | 0.419 | 0.018 |
| TNFRSF12A | 0.421 | 0.015 |
| SNIP1     | 0.422 | 0.000 |
| VCL       | 0.422 | 0.019 |
| QKI       | 0.423 | 0.005 |
| ZADH2     | 0.425 | 0.045 |
| CNIH1     | 0.429 | 0.029 |
| BRPF3     | 0.430 | 0.004 |
| GLIS2     | 0.430 | 0.035 |
| PRPF4B    | 0.430 | 0.015 |
| LRP1      | 0.431 | 0.039 |
| CCZ1B     | 0.432 | 0.014 |
| ANKH      | 0.433 | 0.014 |
| CCNY      | 0.435 | 0.037 |
| NAA30     | 0.435 | 0.022 |
| CRKL      | 0.436 | 0.039 |
| FOXP1     | 0.439 | 0.028 |
| RND1      | 0.440 | 0.007 |
| KCTD5     | 0.440 | 0.037 |
| MED13L    | 0.441 | 0.021 |
| DDX49     | 0.441 | 0.011 |
| TNPO1     | 0.444 | 0.016 |
| ARID5B    | 0.447 | 0.037 |

|          |       |       |
|----------|-------|-------|
| CKAP5    | 0.450 | 0.036 |
| STRN3    | 0.451 | 0.044 |
| CDC42SE2 | 0.451 | 0.015 |
| DDX52    | 0.452 | 0.036 |
| PPIL4    | 0.453 | 0.012 |
| BMPR2    | 0.453 | 0.012 |
| GRB2     | 0.455 | 0.046 |
| ING5     | 0.456 | 0.045 |
| DMD      | 0.456 | 0.025 |
| PIGW     | 0.460 | 0.005 |
| NFIB     | 0.461 | 0.009 |
| PUM2     | 0.462 | 0.010 |
| NUP153   | 0.462 | 0.026 |
| CEPT1    | 0.464 | 0.007 |
| PPRC1    | 0.470 | 0.049 |
| IMMP1L   | 0.470 | 0.025 |
| TRPC1    | 0.471 | 0.032 |
| DNAJC24  | 0.473 | 0.024 |
| CUL5     | 0.473 | 0.014 |
| GLS      | 0.474 | 0.017 |
| B3GNT9   | 0.475 | 0.001 |
| TRIM8    | 0.478 | 0.022 |
| G3BP1    | 0.480 | 0.004 |
| ILF3     | 0.480 | 0.006 |
| FAM179B  | 0.481 | 0.006 |
| VEZF1    | 0.482 | 0.021 |
| MBNL1    | 0.484 | 0.013 |
| TRPS1    | 0.486 | 0.013 |
| CAMK2D   | 0.487 | 0.022 |
| SYNCRIP  | 0.487 | 0.018 |
| SIRT1    | 0.487 | 0.025 |
| CHFR     | 0.493 | 0.008 |
| BAZ2B    | 0.494 | 0.036 |
| GSK3B    | 0.495 | 0.022 |
| YY1      | 0.495 | 0.009 |
| NR2F2    | 0.495 | 0.029 |
| SP2      | 0.498 | 0.003 |
| MIER3    | 0.498 | 0.018 |
| LMO4     | 0.499 | 0.016 |
| PEG3     | 0.500 | 0.048 |
